# Supplementary material for: The preparation, drug loading and in vitro NIR photothermal-controlled release behavior of raspberry-like hollow polypyrrole microspheres
Source: Royal Society of Chemistry journal article supplement (doi:10.1039/c5tb01314c), 2015-01-01
Supplement: c5tb01314c1.pdf [file c5tb01314c1.pdf]

## Supporting Information

### The preparation, drug loading and in-vitro NIR photothermal-controlled release behavior of raspberry-like hollow polypyrrole microspheres

Jie Wang, Fuxing Lin, Mozhen Wang, Xuewu Ge\*

CAS Key Laboratory of Soft Matter Chemistry, Department of Polymer Science and Engineering,  
University of Science and Technology of China, Hefei, Anhui 230026, P. R. China

\* To whom correspondence should be addressed. E-mail: xwge@ustc.edu.cn; Tel: +86-551-63607410

#### Size distribution and Zeta potentials of microspheres measured by DLS

The size distributions and Zeta potentials of PS, H-PPy, and CPT-loaded H-PPy microspheres were measured by dynamic light scattering analysis (DLS) on a Malvern Zetasizer NanoZS-2S90 instrument, as shown in Figure S1.

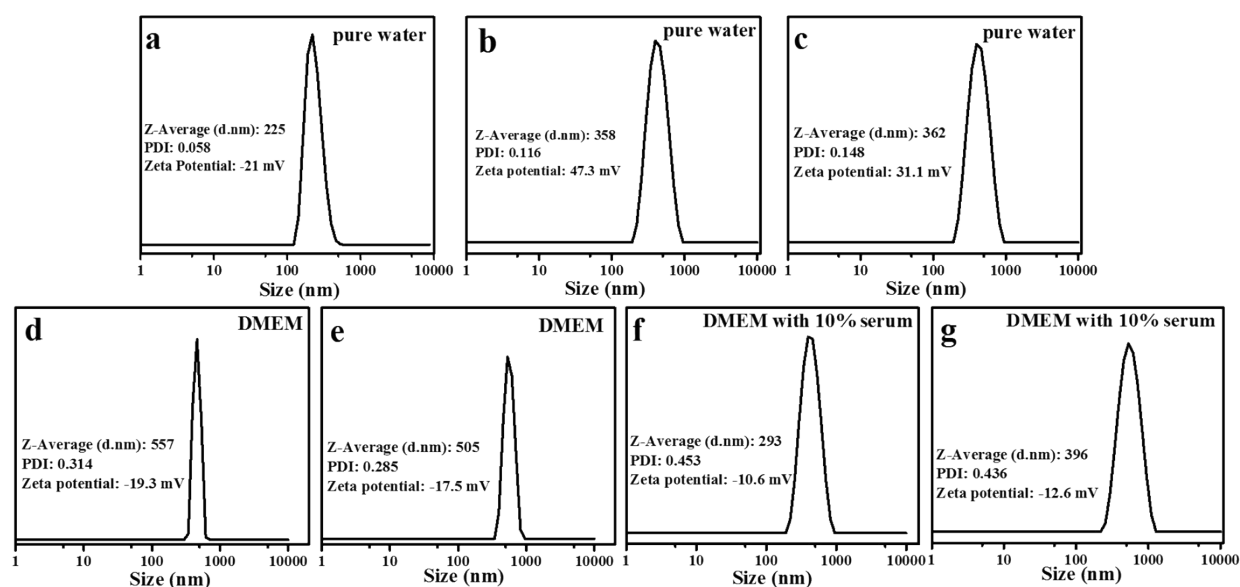

Figure S1. The size distributions of PS (a), H-PPy (b, d, f), and CPT-loaded H-PPy (c, e, g) microspheres in different solvent: (a-c): pure water; (d, e): DMEM; (f, g): DMEM with 10% serum. The data of the size and zeta potential are listed as the mean value (n=3).
